# Supplementary material for: 4-Methylumbelliferone Inhibits Cancer Stem Cell Activation and Overcomes Chemoresistance in Ovarian Cancer
Source: PubMed Central journal article supplement (PMC6721459; doi:10.3390/cancers11081187), 2019-08-15
Supplement: cancers-11-01187-s001.pdf [file cancers-11-01187-s001.pdf]

1 **Supplementary Materials:** The following are available online Figure S1-S3, Table S1-S4

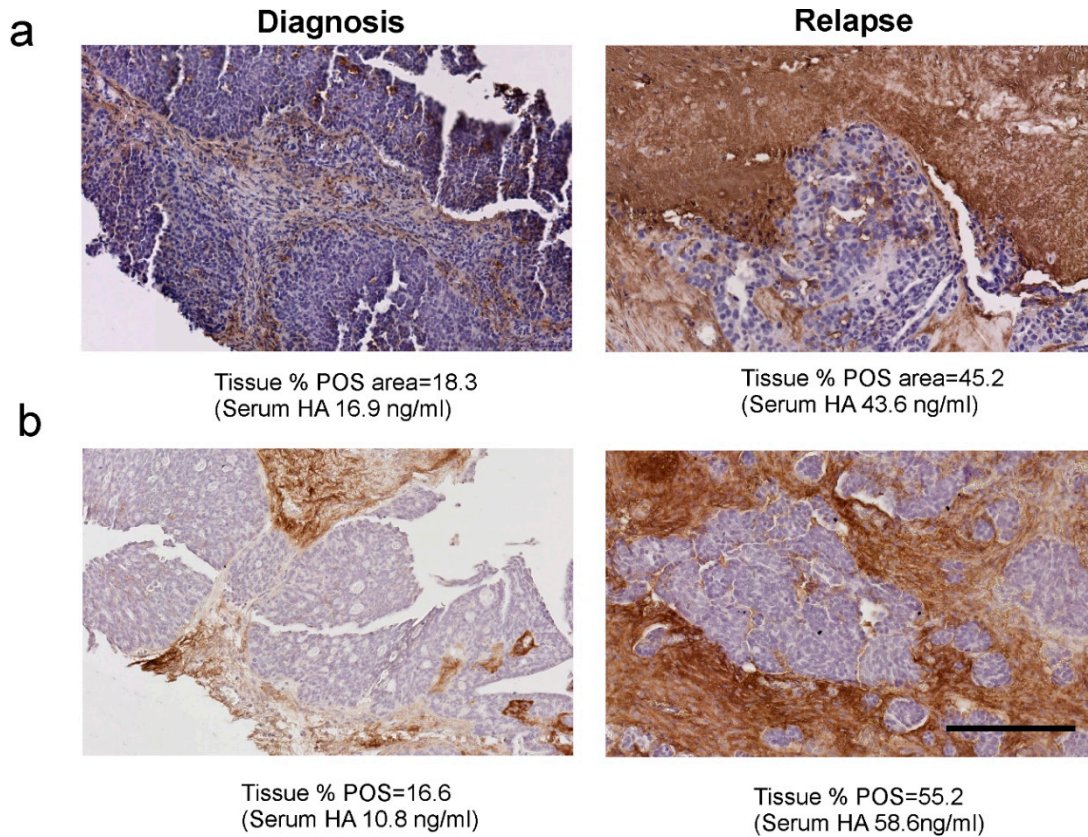

2

3 **Figure S1.** HA staining in matched tissues from two patients (A & B) at diagnosis and at relapse with  
4 chemoresistant disease. HA quantitation (% POS area, arbitrary units) and corresponding serum HA  
5 levels and are shown below the images. Scale bar= 100µm. All images are the same magnification

6

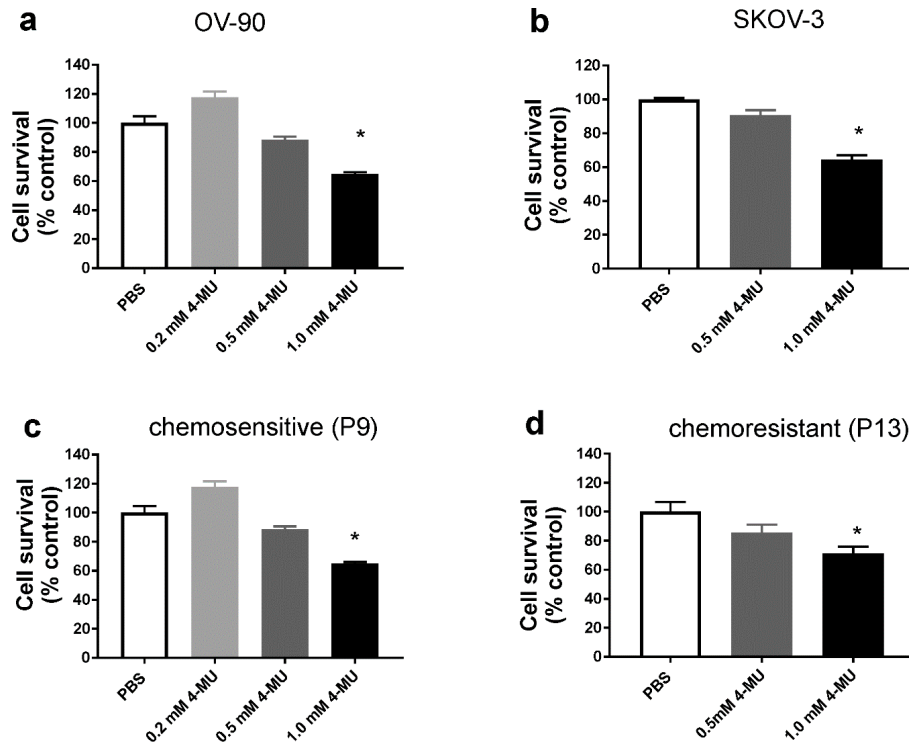

7

8

9

10

11

12

**Figure S2. Effect of increasing concentrations of 4-MU on ovarian cancer cell survival.** a) OV-90, b) SKOV-3, c) chemosensitive primary cells (P9) and d) chemoresistant primary cells (P13). Cells were treated with 4-MU (0.1-1mM) for 72hr. Data is expressed as % of PBS control from 1-2 independent experiments performed in quadruplicate. \*, significantly different from control ( $P < 0.05$ , One Way ANOVA, Tukey's multiple comparisons test)

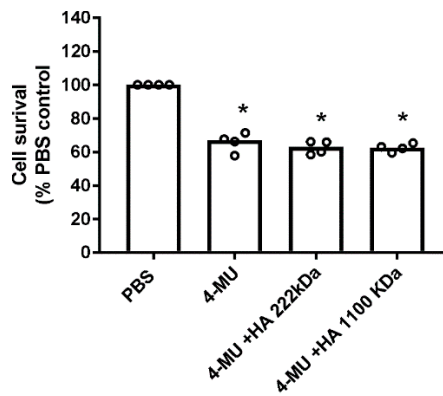

13

14

15

16

17

18

19

20

**Figure S3. Exogenous HA does not reverse effects of 4-MU on ovarian cancer cell survival.** Primary ovarian cancer cells were treated with 4-MU (1mM) for 72hr ± exogenous HA (10µg/ml, 222 kDa (Contripro C CO) and 1100 kDa (Caref laboratories). Data is from primary ovarian cancer cells (n=4) expressed as % of PBS control from 1 independent experiment performed in quadruplicate. \*, significantly different from control ( $P < 0.05$ , One Way ANOVA, Tukey's multiple comparisons test).

21

**Table S1.** Summary of clinical and pathological characteristics of patient serum cohorts.

| Patient | Age at Diagnosis | Diagnosis                                        | Stage | Grade | Progression-free survival (months) | Overall survival (months) | Chemosensitive relapse | Patient status at last follow-up |
|---------|------------------|--------------------------------------------------|-------|-------|------------------------------------|---------------------------|------------------------|----------------------------------|
| 1       | 65               | Serous ovarian carcinoma                         | 2B    | -     | 16.8                               | 96.5                      | Yes                    | Alive <sup>a</sup>               |
| 2*      | 43               | Peritoneal carcinoma                             | 3C    | 3     | 28.6                               | 61.2                      | Yes/No                 | Alive                            |
| 3*      | 82               | Peritoneal carcinoma                             | 3C    | -     | 8.8                                | 58.6                      | Yes/No                 | Cancer <sup>b</sup>              |
| 4       | 77               | Serous papillary carcinoma of the ovary          | 3C    | 3     | 10.8                               | 67.50                     | Yes                    | Alive                            |
| 5       | 78               | Serous papillary carcinoma of the fallopian tube | 3C    | 3     | 11.7                               | 63.60                     | Yes                    | Alive                            |
| 6       | 46               | Papillary serous carcinoma of the ovary          | 3C    | 3     | 11.4                               | 26.4                      | Yes                    | Alive                            |
| 7       | 60               | Serous papillary carcinoma of the ovary          | 3C    | 3     | 16.5                               | 47.50                     | Yes                    | Alive                            |
| 8       | 54               | Serous peritoneal carcinoma                      | 3C    | 3     | 9.2                                | 29.0                      | No                     | Cancer                           |
| 9       | 65               | Serous ovarian carcinoma                         | 1C    | 3     | 46.10                              | 70.80                     | No                     | Cancer                           |
| 10      | 46               | Serous papillary carcinoma ovary                 | 3C    | 3     | 51.0                               | 53.0                      | No                     | Alive                            |
| 11      | 81               | Serous papillary carcinoma peritoneum            | 4     | -     | 13.5                               | 46.6                      | No                     | Cancer                           |
| 12      | 69               | Papillary serous carcinoma of the ovary          | 3A    | 3     | 11.6                               | 28.2                      | No                     | Cancer                           |
| 13      | 78               | Serous papillary carcinoma of the ovary          | 3A    | 3     | 9.6                                | 18.7                      | No                     | Cancer                           |
| 14      | 66               | Serous carcinoma of ovary/ peritoneum            | 3C    | 3     | 12.8                               | 21.1                      | No                     | Cancer                           |

22

\* 1<sup>st</sup> relapse chemosensitive and subsequent chemoresistant relapse

23

<sup>a</sup>Alive=alive at last follow-up, <sup>b</sup>Cancer= death due to ovarian cancer

**Table S2.** Summary of clinical and pathological characteristics of the primary ovarian cancer cells established from patient ascites.

| Patient | Age at Diagnosis (years) | Stage at Diagnosis | Diagnosis                               | Chemosensitive |
|---------|--------------------------|--------------------|-----------------------------------------|----------------|
| 1       | 46                       | IIIC               | Serous papillary carcinoma of the ovary | Yes            |
| 2       | 66                       | IIIC               | Serous carcinoma of ovary/peritoneum    | Yes            |
| 3       | 72                       | IIIC               | Serous papillary carcinoma of the ovary | Yes            |
| 4       | 46                       | IIIC               | Serous papillary carcinoma of the ovary | Yes            |
| 5       | 61                       | IIIA               | Papillary serous carcinoma of the ovary | Yes            |
| 6       | 58                       | IIIC               | Serous papillary carcinoma of the ovary | Yes            |
| 7       | 80                       | IIIC               | Serous papillary carcinoma of the ovary | Yes            |
| 8       | 60                       | IIIC               | Serous papillary carcinoma of the ovary | No             |
| 9       | 80                       | IIIC               | Peritoneal carcinoma                    | No             |
| 10      | 47                       | IIIC               | Recurrent serous carcinoma of the ovary | No             |
| *11     | 59                       | IA                 | Recurrent serous tubal                  | No             |
| 12      | 47                       | IIIC               | Recurrent serous peritoneal cancer      | No             |
| 13      | 81                       | IV                 | Recurrent serous peritoneal carcinoma   | No             |
| 14      | 43                       | IIC                | Recurrent serous peritoneal carcinoma   | No             |
| *15     | 59                       | IA                 | Recurrent serous tubal                  | No             |
| **16    | 48                       | IV                 | Recurrent serous peritoneal             | No             |
| 17      | 69                       | IIIA               | Recurrent serous ovarian cancer         | No             |
| **18    | 48                       | IV                 | Recurrent serous peritonea              | No             |
| 19      | 57                       | -                  | Recurrent serous carcinoma              | No             |

\* Ovarian cancer cells were derived from the same patient following an interval of 21 months

\*\* Ovarian cancer cells were derived from the same patient following an interval of 1 month

**Table S3.** Summary of Taqman gene probes used for qRT-PCR.

| Gene           | Catalogue number |
|----------------|------------------|
| <i>HAS1</i>    | Hs00987417_g1    |
| <i>HAS2</i>    | Hs00193435_ml    |
| <i>HAS3</i>    | Hs00193436_ml    |
| <i>HYAL1</i>   | Hs00201046_m1    |
| <i>HYAL2</i>   | Hs01117343_g1    |
| <i>ALDH1A1</i> | Hs00946916_m1    |
| <i>PROM1</i>   | Hs00195682_m1    |
| <i>CD44</i>    | Hs01075864_m1    |
| <i>ABCG2</i>   | Hs01053790_m1    |
| <i>ACTB</i>    | 4333762F         |

**Table S4.** Summary of clinical and pathological characteristics of ovarian cancer tissue explant tissue cohort.

| Patient | Age at Diagnosis (years) | Stage at Diagnosis | Grade | Diagnosis                                    | Chemosensitive  |
|---------|--------------------------|--------------------|-------|----------------------------------------------|-----------------|
| 1       | 66                       | IIIC               | 3     | Serous papillary carcinoma of the ovary      | No chemotherapy |
| 2       | 51                       | IIIC               | 3     | Serous papillary carcinoma of the peritoneum | No              |
| 3       | 66                       | IIIC               | 3     | Serous papillary carcinoma of the ovary      | Yes             |
| 4       | 80                       | IIIC               | 3     | Primary peritoneal carcinoma                 | Yes             |
| 5       | 55                       | IIIC               | 3     | Serous carcinoma of peritoneum               | No              |
